## Core Role of TRPC6 Channels in Regulating Airway Re-modelling in Chronic Obstructive Pulmonary Disease

Kun Zhao<sup>1</sup> Raoying Xie<sup>2</sup> Jie Wei<sup>3</sup> Wenyue Gu<sup>4</sup> Zhenghua Fei<sup>2</sup>

1. Department of Oncology, Huaian Hospital of Huaian City, No.161 Zhenhuailou East Road, Huaian 223200, PR China
2. Department of Oncology, the 1st Affiliated Hospital of Wenzhou Medical University, Wenzhou 325000, PR China.
3. Department of Basic Medical Sciences, Medical College, Xiamen University, Xiamen 361101, PR China.
4. Department of Pathology, Yancheng Hospital Affiliated Southeast University, Yancheng, 224000, China.

Corresponding authors: Zhenghua Fei: [feizhenghua@wzhospital.cn](mailto:feizhenghua@wzhospital.cn)

### **Withdrawal Statement**

This manuscript has been withdrawn by the authors as they did not obtain patient consent for the tissue samples use in this study and were, therefore, not able to be approved by the Institute's Ethics Committee of Wenzhou Medical University. The authors also declare that there are interest conflict about authorship. Therefore, the authors do not wish this work to be cited as reference for the project. If you have any questions, please contact the corresponding author.

Sincerely,

Zhenghua Fei

02. 10. 2020
